# Supplementary material
Source: PubMed Central journal article supplement (PMC4677993)
Supplement: NIHMS663253-supplement-supplement_1.pdf [file NIHMS663253-supplement-supplement_1.pdf]

ESRD patients, expression of N1ICD and FSP-1 was detected by immunofluorescent staining with FSP-1 (n = 7).

Supplemental Figure 1. Wnt1-Cre mediates GFP expression in RFP-Stop<sup>flox/flox</sup>-GFP/Wnt1-Cre<sup>+</sup> mice.

Supplemental Figure 2. Electrophoretic mobility shift assay (EMSA) of Notch-dependent binding activity to the FSP-1 promoter after TGF- $\beta$ 1 treatment. SMCs were exposed to TGF- $\beta$ 1 with or without pretreatment with DAPT (10  $\mu$ M) for 30 min. The nuclear proteins were prepared and incubated with Dye-680 labeled probe (P4).

Supplemental Table 1. The location of primers used for ChIP assay covers the RBP-J $\kappa$  binding sites in the FSP-1 promoter.

Supplemental Table 2. The probes used for EMSA assays.

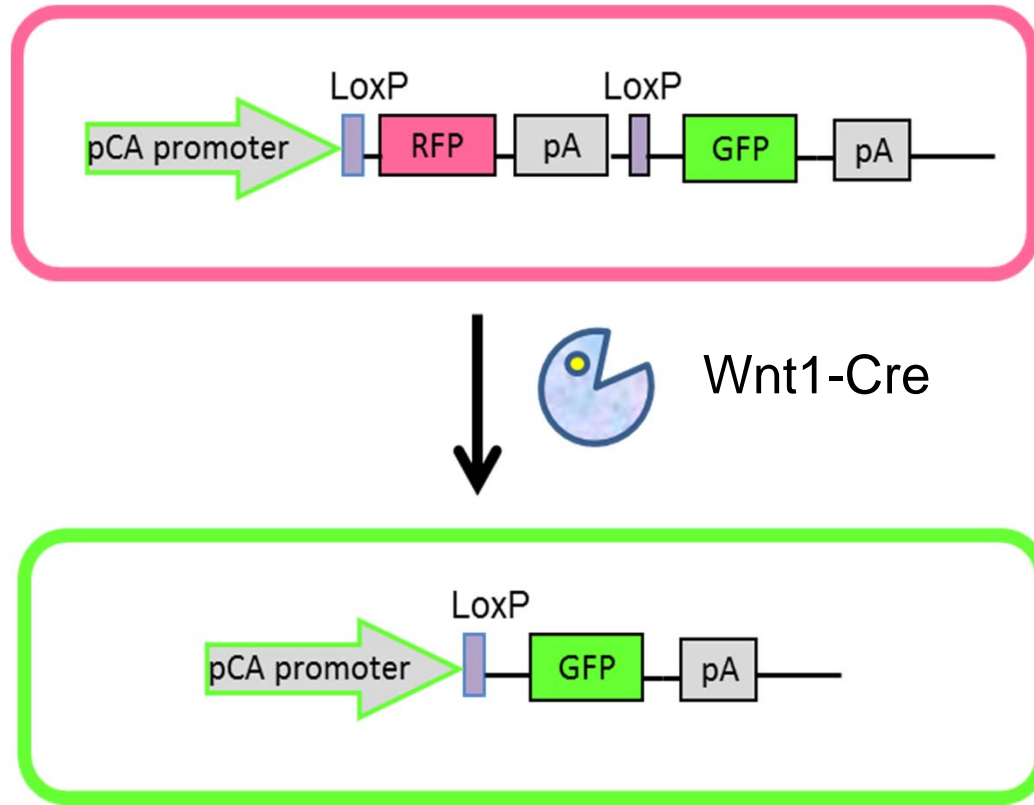

Supplemental Figure 1.

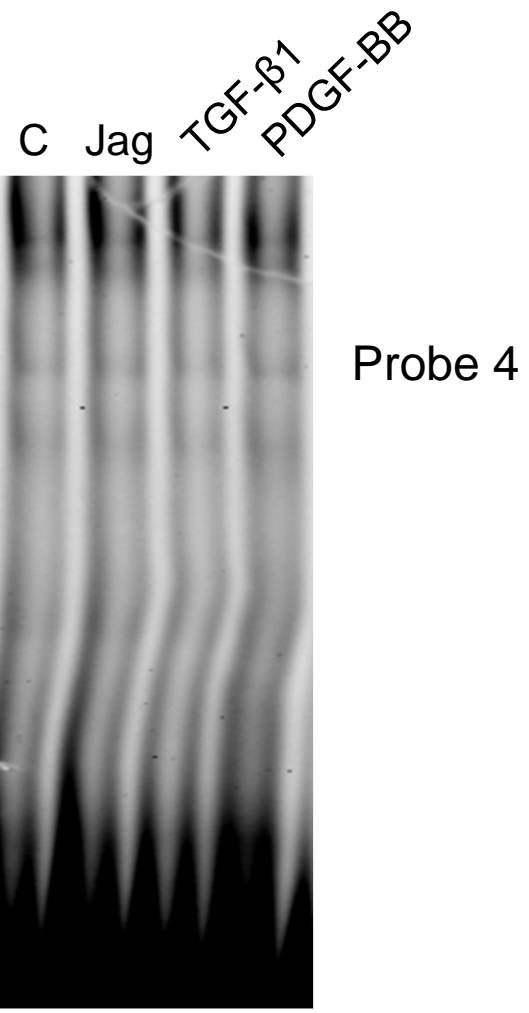

Supplemental figure 2

**Supplemental Table 1. Primers used for Chip assay.**

| Primers | Location from TTS | Upstream primers (5'-3') | Downstream primers (5'-3') |
|---------|-------------------|--------------------------|----------------------------|
| set 1   | -2962 to -2766    | TCA GGT GGG TAG GAT GAG  | CCA GAA CAC TCA TGA ATT    |
| Set2    | -2659 to -2490    | TAG CCT CTG ATC CAA AGG  | CTG GGT GGG GTT AGC ACA    |
| Set3    | -2071 to -1924    | TCT TGG ACT TTC AAG GAG  | TTA ATC TCT AAG GAT AGG    |
| Set4    | -1722 to -1590    | CCT CCT GAC TTG CTA GCC  | CCC TGG AAA TAT GTG GCC    |
| Set5    | -1417 to -1275    | GAT TGT GCC TGC TGG GGA  | CCT GCC AGG CCC TGC CCA    |
| Set6    | -754 to -581      | CTG GAG CAA ATG CCA AGG  | AAC ACG AAT GCC TGC AGG    |
| Set7    | -580 to -455      | TGT AGT GTG TCT TAT TTT  | AGC TGC CTA ATA GGA GTA    |
| Set8    | -417 TO -278      | GCA GCC GCG CCC AAC GCT  | CAG CAC CTT TCT GTG CCT    |

**Supplemental Table 2. Probe used for EMSA assay.**

| Probe location      | Probe information               | Probe sequence                      |
|---------------------|---------------------------------|-------------------------------------|
| Area in Prime set 6 | Upstream-labeled with Irdye 800 | 5'-CTTGGTGGCAAGCACCTCTACCCACTGAG-3' |
|                     | Downstream                      | 5'-CTCAGTGGGTAGAGGTGCTTGCCACCAAG-3' |
| Area in Prime set 4 | Upstream-labeled with Irdye 680 | 5'-TAGGCTGGAGGGAAGTGCTGA-3'         |
|                     | Downstream                      | 5'-TCAGCACTTCCCTCCAGCCTA-3'         |
